# Supplementary material for: Shape-Controlled Synthesis of Au Nanostructures Using EDTA Tetrasodium Salt and Their Photothermal Therapy Applications
Source: MDPI journal article supplement (doi:10.3390/nano8040252), 2018-04-18
Supplement: s1 [file s1]

Supplementary Materials

# Shape-Controlled Synthesis of Au Nanostructures using EDTA Tetrasodium Salt and Their Photothermal Therapy Applications

Youngjin Jang <sup>1</sup>, Nohyun Lee <sup>2</sup>, Jeong Hyun Kim <sup>3</sup>, Yong Il Park <sup>4,\*</sup> and Yuanzhe Piao <sup>5,\*</sup>

<sup>1</sup> Schulich Faculty of Chemistry, Solid State Institute, Russell Berrie Nanotechnology Institute, Nancy and Stephen Grand Technion Energy Program, Technion–Israel Institute of Technology, Haifa 3200003, Israel; youngjin@technion.ac.il

<sup>2</sup> School of Advanced Materials Engineering, Kookmin University, Seoul 02707, Republic of Korea; nohyunlee@kookmin.ac.kr

<sup>3</sup> Center for Nanoparticle Research, Institute for Basic Science, and School of Chemical and Biological Engineering, Seoul National University, Seoul 151-742, Republic of Korea; jhkim113@snu.ac.kr

<sup>4</sup> School of Chemical Engineering, Chonnam National University, Gwangju 61186, Republic of Korea

<sup>5</sup> Graduate School of Convergence Science and Technology & Advanced Institutes of Convergence Technology, Seoul National University, Suwon 16229, Republic of Korea

\* Correspondence: ypark@jnu.ac.kr (Y.I.P.); parkat9@snu.ac.kr (Y.P.); Tel.: +82-62-530-1886 (Y.I.P.); Tel.: +82-31-888-9141 (Y.P.)

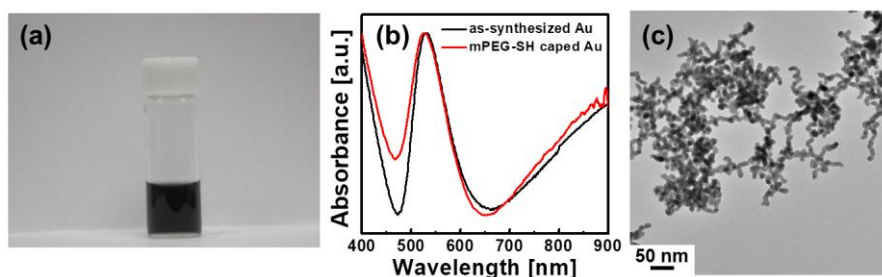

**Figure S1.** (a) Photograph of mPEG-SH stabilized Au nanowire networks kept in ambient conditions for one month, showing good stability, (b) absorption spectra of as-synthesized Au nanowire networks (black curve) and mPEG-SH coated Au nanowire networks (red curve), and (c) TEM image of Au nanowire networks after mPEG-SH coating.

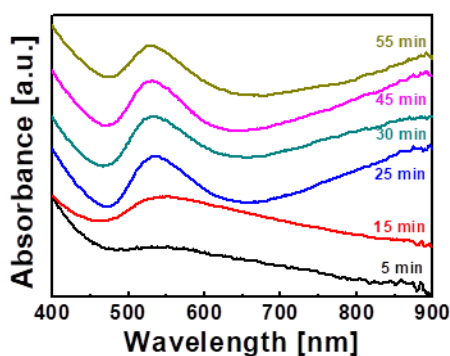

**Figure S2.** Absorption spectra of Au nanostructures taken at different stages of the reaction.

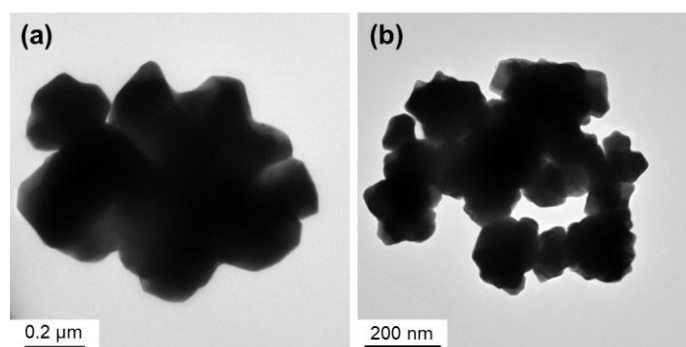

**Figure S3.** TEM images of Au aggregates generated by using (a) EDTA and (b) EDTA disodium salt.

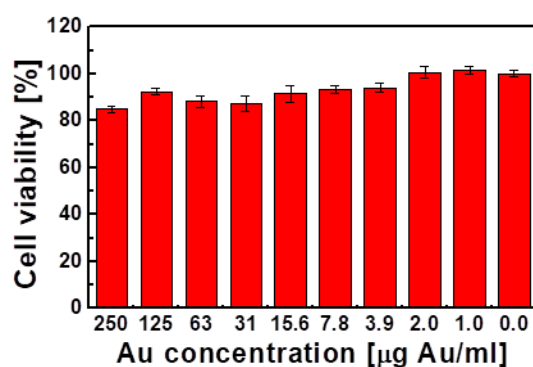

**Figure S4.** The cell viability of Au nanowire networks by MTT assay.

**Table S1.** The pH values at different reaction conditions.

| Condition                                                                                                                  | pH    |
|----------------------------------------------------------------------------------------------------------------------------|-------|
| Aqueous solution containing 30 mg of EDTA tetrasodium salt in 7 mL of deionized water                                      | 10.98 |
| Aqueous solution containing 30 mg of EDTA tetrasodium salt and 0.1 mL of 0.1 M $\text{HAuCl}_4$ in 7 mL of deionized water | 9.77  |
| Aqueous solution containing spherical Au nanocrystals after purification                                                   | 8.81  |

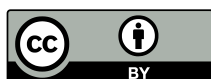

© 2018 by the authors. Submitted for possible open access publication under the terms and conditions of the Creative Commons Attribution (CC BY) license (<http://creativecommons.org/licenses/by/4.0/>).
